# Supplementary material
Source: Springer Nature journal article supplement (http://publikationen.ub.uni-frankfurt.de/opus4/files/868/12860_2007_21_MOESM6_ESM.pdf)

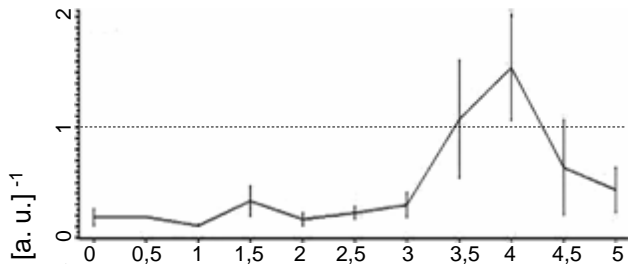

No. 24

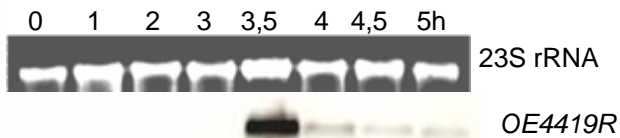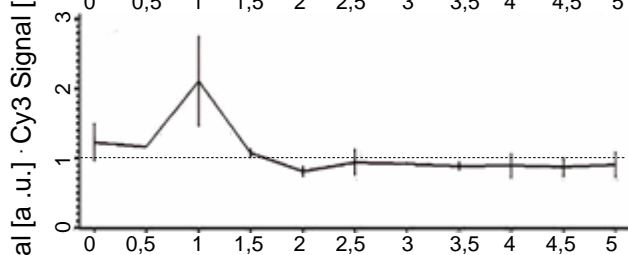

No. 85

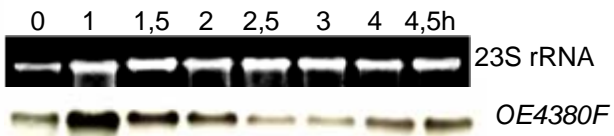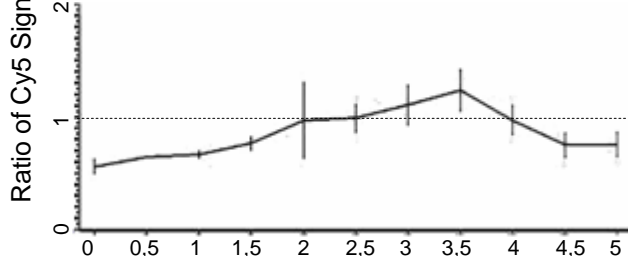

No. 21

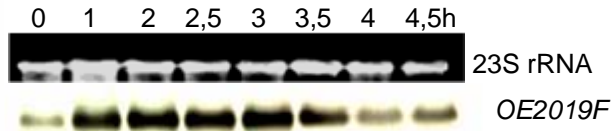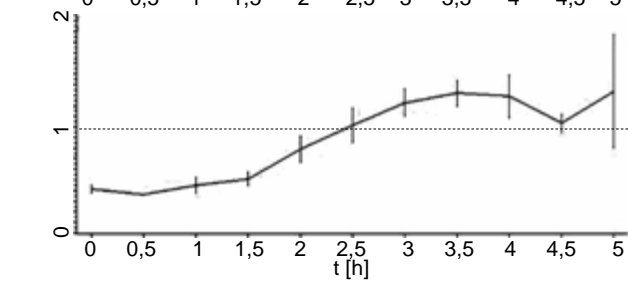

No. 49

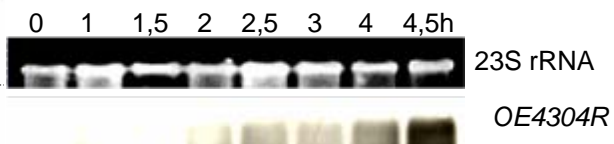

Supplement: MOESM6 [file 12860_2007_21_MOESM6_ESM.pdf]
